# Supplementary material
Source: Springer Nature journal article supplement (https://www.springermedizin.de/resource/supplementary/12876_2009_459_MOESM3_ESM.pdf/9437058)

T6 N6 T7 N7 T8 N8 T9 N9 T10 N10 T11 N11 T12 N12 T13 N13 T14 N14 T15 N15 T16 N16 T17 N17 T18 N18 T19 N19 T20 N20 T21 N21

**MBL2**

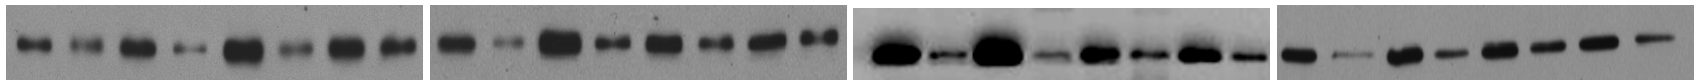

**MLCK2**

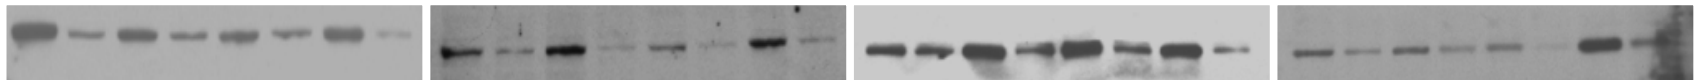

**$\beta$ -Actin**

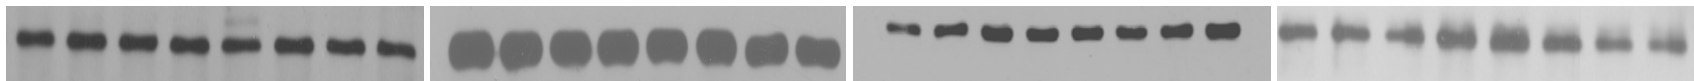

Supplement: MOESM3 [file 9437058]
